# Supplementary material for: Effects of receptor properties on particle internalization through receptor-mediated endocytosis
Source: Royal Society of Chemistry journal article supplement (doi:10.1039/d3sm00149k), 2023-01-01
Supplement: d3sm00149k1.pdf [file d3sm00149k1.pdf]

## Supporting Information

# Effects of Receptor Properties on Particle Internalization through Receptor-mediated Endocytosis

Md Muhtasim Billah<sup>a</sup>, Hua Deng<sup>b</sup>, Prashanta Dutta<sup>a</sup> and Jin Liu<sup>a</sup>

a. School of Mechanical and Materials Engineering, Washington State University, Pullman, WA 99163, USA.

b. Google, Kirkland, WA 98033, USA.

Email: jin.liu2@wsu.edu

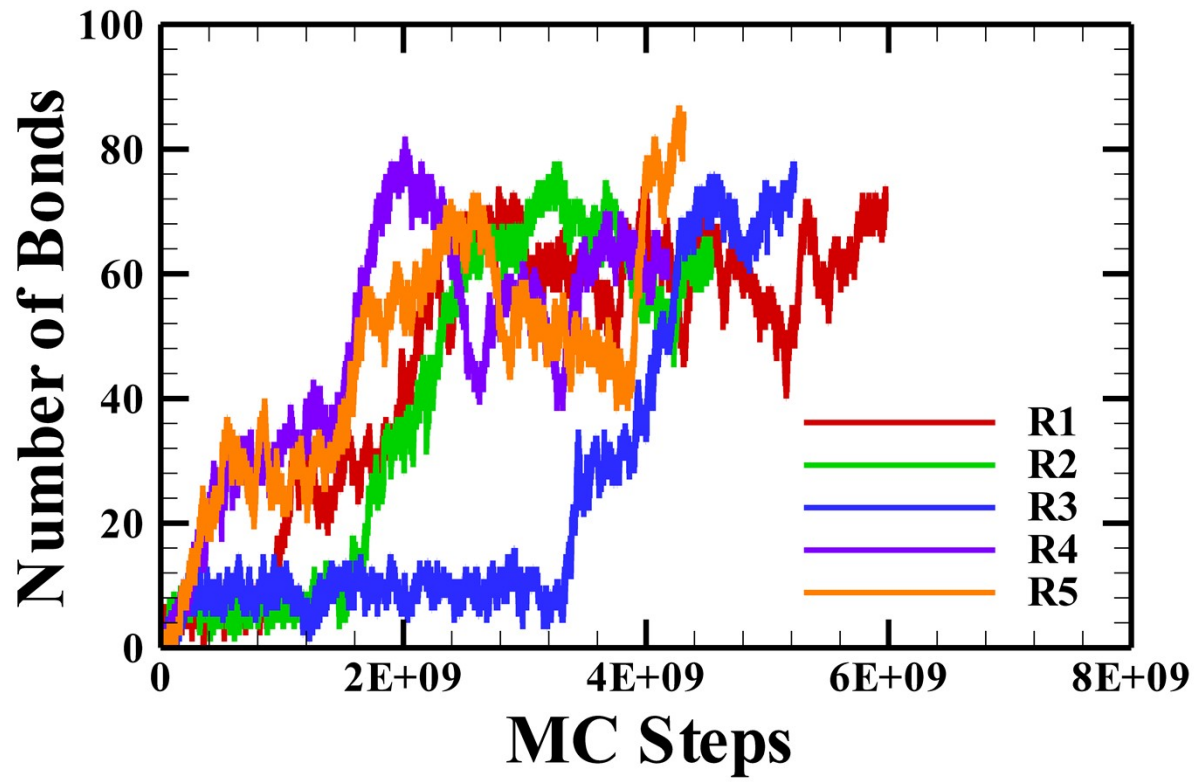

**Fig. S1:** The number of bonds as a function of MC steps for all five independent realizations for the case when  $EI = 20000 \text{ pN.nm}^2$

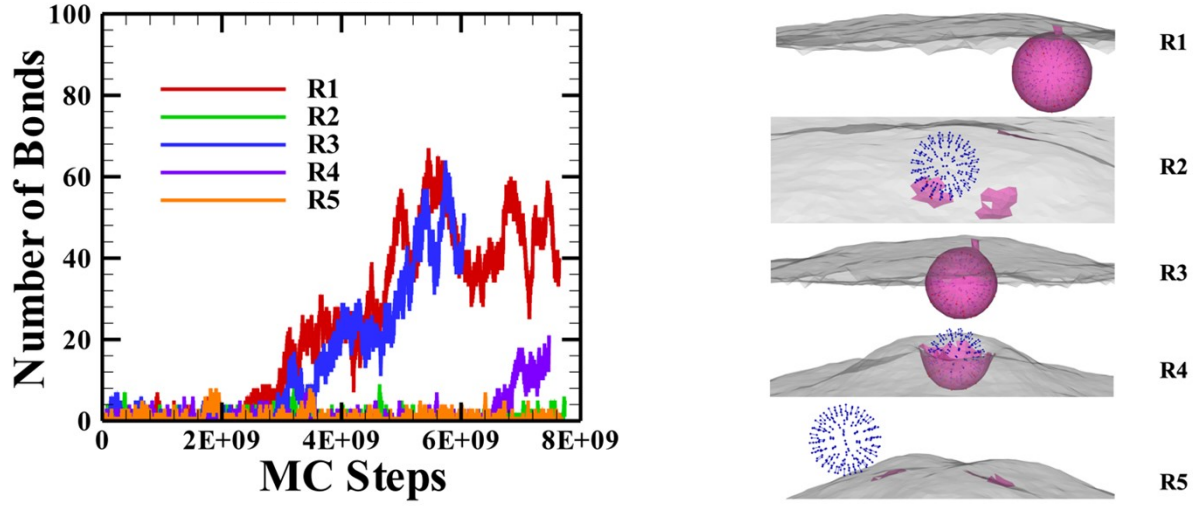

**Fig. S2.** (a) Number of bonds against MC steps for 5 independent simulations of  $EI = 40000 \text{ pN.nm}^2$ . (b) The corresponding equilibrium profiles. Among the 5 realizations, 2 simulations (R1 and R3) show complete internalization, 2 simulations (R2 and R5) show no internalization, and 1 simulation (R4) shows partial internalization.

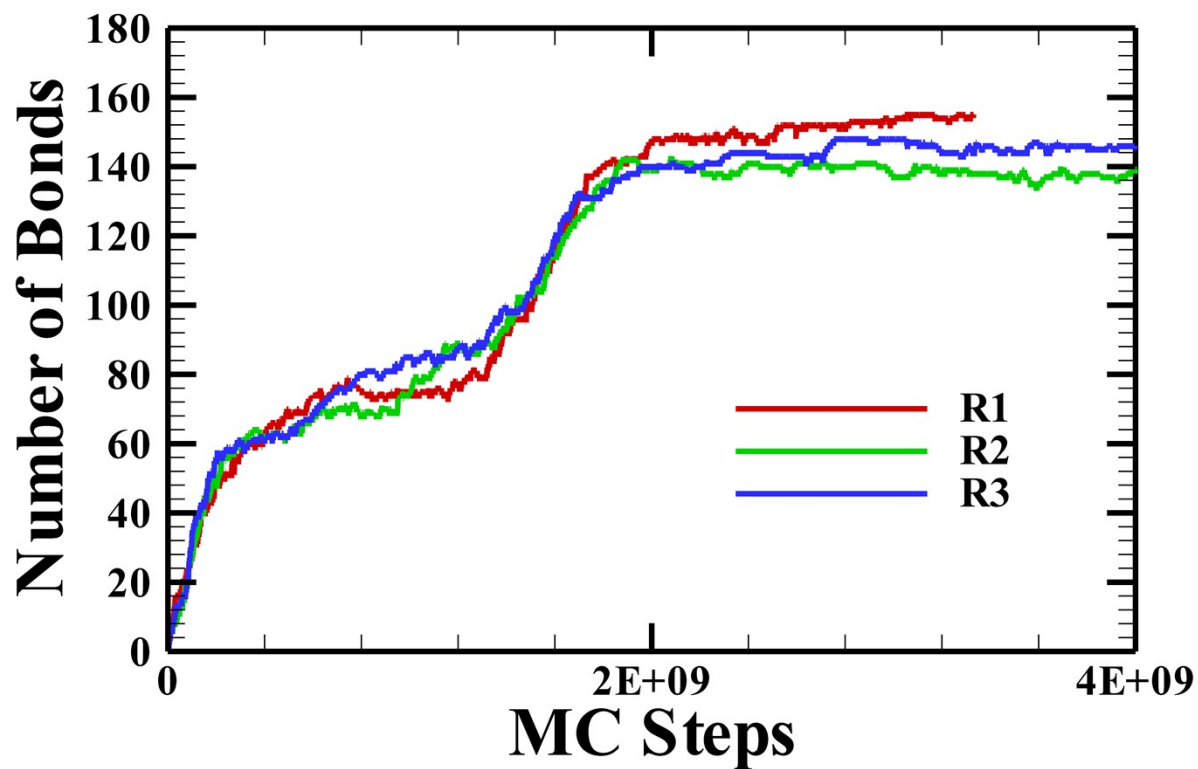

**Fig. S3.** The number of bonds as a function of MC steps for all three independent realizations for the case of  $L_{rec} = 2.3 \text{ nm}$  and  $d_c = 0.9 \text{ nm}$  with clathrin.
